# Supplementary material for: Long-term performance of enhanced biological phosphorus removal with increasing concentrations of silver nanoparticles and ions
Source: Royal Society of Chemistry journal article supplement (doi:10.1039/c3ra40989a), 2013-01-01
Supplement: c3ra40989a.pdf [file c3ra40989a.pdf]

Supplementary Information

Long-Term Performances of Enhanced Biological Phosphorus Removal with Increasing  
Concentrations of Silver Nanoparticles and Ions

Hong Chen, Xiong Zheng, Yinguang Chen\*, Hui Mu

(State Key Laboratory of Pollution Control and Resources Reuse, School of Environmental Science and Engineering, Tongji University,  
1239 Siping Road, Shanghai 200092, China)

\*Corresponding author

E-mail: yg2chen@yahoo.com

Tel: 86-21-65981263

Fax: 86-21-65986313

Journal: RSC Advances

Document prepared: Mar. 22, 2013

Number of pages: 10

Number of figures: 5

Number of tables: 6

17 **Synthetic Wastewater.** The synthetic wastewater included stock SOP solution named “P - water”, “concentration  
18 solution”, “trace-element solution” (adapted from Smolders et al.<sup>1</sup>), a certain amount of carbon source and tap water.  
19 The P-water contained (g/L): 23.5  $\text{KH}_2\text{PO}_4$  and 17.6  $\text{K}_2\text{HPO}_4 \cdot 3\text{H}_2\text{O}$ . The concentrated solution contained (g/L): 25.88  
20 peptone, 4.24 yeast extract, 33.94  $\text{MgCl}_2 \cdot 6\text{H}_2\text{O}$ , 19.09  $\text{MgSO}_4 \cdot 7\text{H}_2\text{O}$ , 8.91  $\text{CaCl}_2 \cdot 2\text{H}_2\text{O}$ , 8.91  $\text{NH}_4\text{Cl}$  and 0.11  
21 allylthiourea (nitrification inhibitor). The trace-element solution contained (g/L): 1.50  $\text{FeCl}_3 \cdot 6\text{H}_2\text{O}$ , 0.03  $\text{CuSO}_4 \cdot 5\text{H}_2\text{O}$ ,  
22 0.12  $\text{MnCl}_2 \cdot 4\text{H}_2\text{O}$ , 0.06  $\text{Na}_2\text{MoO}_4 \cdot 2\text{H}_2\text{O}$ , 0.12  $\text{ZnSO}_4 \cdot 7\text{H}_2\text{O}$ , 0.15  $\text{CoCl}_2 \cdot 6\text{H}_2\text{O}$ , 0.18 KI, 0.15  $\text{H}_3\text{BO}_3$  and 10  
23 ethylenediamine tetraacetic acid. One liter of synthetic wastewater contained 1.94 mL of P-water, 2.14 mL of  
24 concentrated solution, 0.27 mL of trace-element solution, and 0.267 mL of acetic acid. The synthetic wastewater final  
25 composition of the influent contained (mg/L): 55.38 peptone, 9.07 yeast extract, 72.63  $\text{MgCl}_2 \cdot 6\text{H}_2\text{O}$ , 40.85  
26  $\text{MgSO}_4 \cdot 7\text{H}_2\text{O}$ , 19.07  $\text{CaCl}_2 \cdot 2\text{H}_2\text{O}$ , 19.07  $\text{NH}_4\text{Cl}$ , 0.24 allylthiourea, 0.41  $\text{FeCl}_3 \cdot 6\text{H}_2\text{O}$ , 0.01  $\text{CuSO}_4 \cdot 5\text{H}_2\text{O}$ , 0.03  
27  $\text{MnCl}_2 \cdot 4\text{H}_2\text{O}$ , 0.02  $\text{Na}_2\text{MoO}_4 \cdot 2\text{H}_2\text{O}$ , 0.03  $\text{ZnSO}_4 \cdot 7\text{H}_2\text{O}$ , 0.04  $\text{CoCl}_2 \cdot 6\text{H}_2\text{O}$ , 0.05 KI, 0.04  $\text{H}_3\text{BO}_3$ , 2.70  
28 ethylenediamine tetraacetic acid, 45.59  $\text{KH}_2\text{PO}_4$ , 34.14  $\text{K}_2\text{HPO}_4 \cdot 3\text{H}_2\text{O}$  and 280 acetic acid.

29 **Operation of Parent Sequencing Batch Reactors (SBRs).** Activated sludge used in this study was cultured with  
30 synthetic wastewater in a series of anaerobic-aerobic SBRs, which had a working volume of 4 L each and operated  
31 with a cycle of 8 h consisting of 2 h anaerobic and 3h aerobic periods, followed by 1h settling, 10 min decanting and  
32 110 min idle periods. All reactors were covered with aluminium foil, maintained at  $21 \pm 1$  °C and constantly mixed with  
33 a magnetic stirrer except the settling, decanting and idle periods. The influent pH in each reactor was adjusted to 7.5  
34 by adding 4M NaOH or 4M HCl. In the aerobic stage, air was provided by an aerator using an on/off control system,  
35 and the dissolved oxygen (DO) concentration was maintained at around 6 mg/L. After the settling period, 3 L of the  
36 supernatant was discharged, and replaced with 3 L of fresh synthetic wastewater during the next initial 10 min of the  
37 anaerobic time. The mixed liquid suspended solid (MLSS) was controlled at  $3200 \pm 190$  mg/L in the parent SBRs.  
38 Sludge was wasted at the end of aerobic periods to keep the solids retention time (SRT) at approximately 10 d. The  
39 initial chemical oxygen demand (COD) concentration in each SBR was increased progressively over a 30 d period

40 from around 80 to approximately 300 mg/L. After around 120 d of acclimatization, the phosphorus anaerobic release  
41 and aerobic uptake in each SBR reached relatively stable.

42 **Determination of Activities of Exopolyphosphatase (PPX) and Polyphosphate Kinase (PPK).** The determination  
43 of PPX activity was conducted according to the references.<sup>2,3</sup> The reaction was carried out at 30 °C after adding 50 uL  
44 crude extracts to the reaction mixture containing 0.5 M Tris-HCl buffer (pH 7.4), 5 mM MgCl<sub>2</sub> and 2.5 mM  
45 p-nitrophenyl phosphate. After 45 min incubation, 2 mL of 0.5 M KOH was added to terminate the reaction, followed  
46 by measuring the absorbance at 405 nm. The specific PPX activity was defined as the production of umol  
47 p-nitrophenol/(min•mg protein).

48 The assay of polyphosphate (poly-P) utilization was used to determine the PPK activity.<sup>4</sup> The reaction, in a final  
49 volume of 1 mL, contained 100 mM Tris-HCl (pH 7.4), 8 mM MgCl<sub>2</sub>, 200 mM D-glucose, 0.5 mM NADP, 150 ug of  
50 Sigma Type 45 poly-P, 1 unit of HK, 1 unit of G6P-DH, and 150 uL of crude extracts. Ap5A was included in the  
51 assay to inhibit adenylate kinase. The reaction was started by adding the ADP resulting in a final concentration of 1  
52 mM. The produced NADPH was measured spectrophotometrically at 340 nm.<sup>5</sup> The specific PPK activity was  
53 determined as the production of umol NADPH/(min•mg protein).

54 **Analysis of Bacterial Community Structure.** PCR-DGGE was first utilized to analyze the bacterial community  
55 structure in the EBPR systems. Bacterial genomic DNA of activated sludge was extracted using the FastDNA Kit  
56 (BIO 101; Vista, CA, USA) according to the manufacturer's instructions. The 16S rDNA variable V3 region of  
57 the extracted DNA was amplified with primers 338f with a GC clamp  
58 (5'-CGCCCGCCGCGCGGCGGGCGGGGCGGGGCGGGGGCACGGGGGGACTCCTACGGGAGGCAGCAG-3')  
59 and 518r (5'-ATTACCGCGGCTGCTGG-3').<sup>6</sup> The detailed procedures of PCR and DGGE were according to  
60 the literature.<sup>7</sup> All prominent bands were excised from gel sequenced via an ABI PRISM 3730 automated DNA  
61 sequencer (Applied Biosystems, USA) and deposited into the GenBank database under accession numbers  
62 JQ954834-JQ954839. Then, the closest matching sequences were searched using the BLAST program. The

quantifications of polyphosphate accumulation organisms (PAO), glycogen accumulation organisms (GAO) and total bacteria in activated sludge were conducted by fluorescence in situ hybridization (FISH) analysis.

**Microbial Quantitative Changes Analyzed by FISH with 16S rRNA-targeted Oligonucleotide Probes.** The quantifications of PAO, GAO and total bacteria in activated sludge were conducted by FISH analysis. Activated sludge obtained from the SBR-1, SBR-2 and SBR-3 was fixed with freshly prepared 4% paraformaldehyde for 8 h at 4 °C. After being rinsed with phosphate buffer (PBS, pH 7.2), 10 uL of samples were immobilized on gelatin coated glass slide, dehydrated in the ethanol serials (50%, 75%, 85% and 98%, 3 min per step), and finally dried in air. The following oligonucleotide probes, EUBMIX (containing EUB338, EUB338-II and EUB338-III, specific for most *Bacteria*), PAOMIX (containing PAO462, PAO651 and PAO846, specific for *Accumulibacter*) and GAOMIX (containing GAOQ431, GAOQ989 and GB\_G2, TFO\_DF218, TFO\_DF618, specific for *Candidatus Competibacter phosphatis*), were used for hybridization and listed in Table S1 (Supplementary Information). These probes were commercially synthesized and labeled with FITC, AMCA, Cy3 at the 5' end, respectively. Hybridization on the slide glass was performed according to the method of Amann et al. with slight modification.<sup>8</sup> Briefly, 20 uL of hybridization buffer (0.9 M NaCl, 20 mM Tris-HCl (pH 7.2), 0.01% sodium dodecyl sulfate, 35% deionized formamide and 0.2 ng probes) was hybridized with the fixed samples, and then the slides were incubated in a prewarmed Boekel InSlide Out Hybridization Oven (Boekel Scientific, USA) at 46 °C for 2 h, followed by a washing step at 48 °C for 20 min in a washing buffer (20 mM Tris-HCl (pH 7.2), 70 mM NaCl, 5 mM EDTA and 0.01% SDS). The washing buffer was removed by rinsing with sterile water and the slide was dried in air. FISH samples were finally observed using the Laser Scanning Confocal Microscope (Leica TCS SP2). Each sample had triplicated test, and five fields were chosen to take images for every test, which meant that there were 15 images for each sample used for FISH quantification. The abundance of *Accumulibacter* or *Candidatus Competibacter phosphatis* was determined as the mean image area targeted by PAOMIX or GAOMIX and that targeted by EUBMIX in the image analyzing software (Image-Pro Plus, V6.0, Media Cybernetics).

86 **Measurement of AgNPs Dissolution in Synthetic Wastewater.** The released  $\text{Ag}^+$  in synthetic wastewater due to the  
87 dissolution of AgNPs was determined according to the literature with some modification.<sup>9</sup> Briefly, 5 vials containing  
88 the synthetic wastewater (pH 7.5) and AgNPs (0, 1, 3 and 5 mg/L) were shaken for 5 h at  $21 \pm 1$  °C after 2h  
89 ultrasonication, and AgNPs were then removed by high speed centrifugation (12000 g) for 20 min. The supernatant  
90 was collected, filtered through 0.22  $\mu\text{m}$  mixed cellulose ester membrane, and determined by inductively coupled  
91 plasma optical emission spectrometry (ICP-OES, PerkinElmer Optima 2100 DV, USA) after acidified with 4%  
92 ultrahigh purity  $\text{HNO}_3$ .

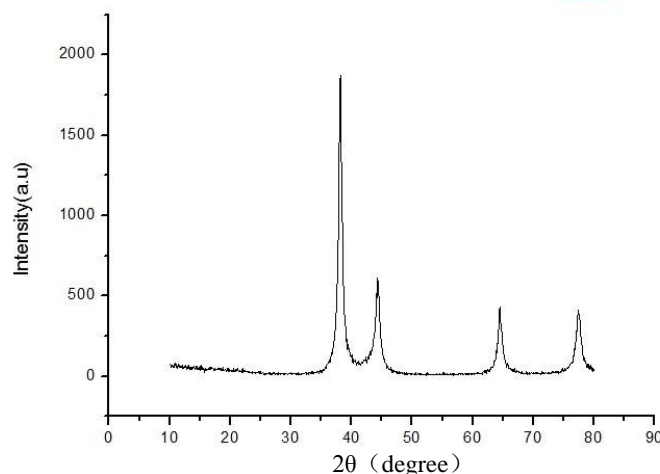

94  
95 **Fig. S1 X-ray diffraction (XRD) pattern of AgNPs used in this study.**

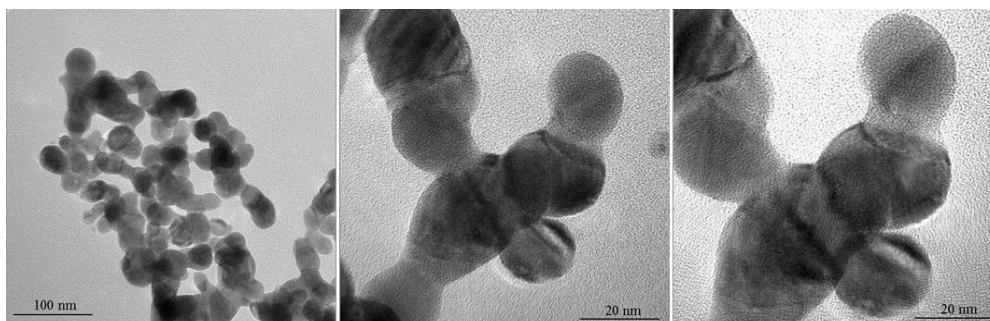

96  
97  
98 **Fig. S2 Images of transmission electron microscope (TEM) of AgNPs used in this study.**

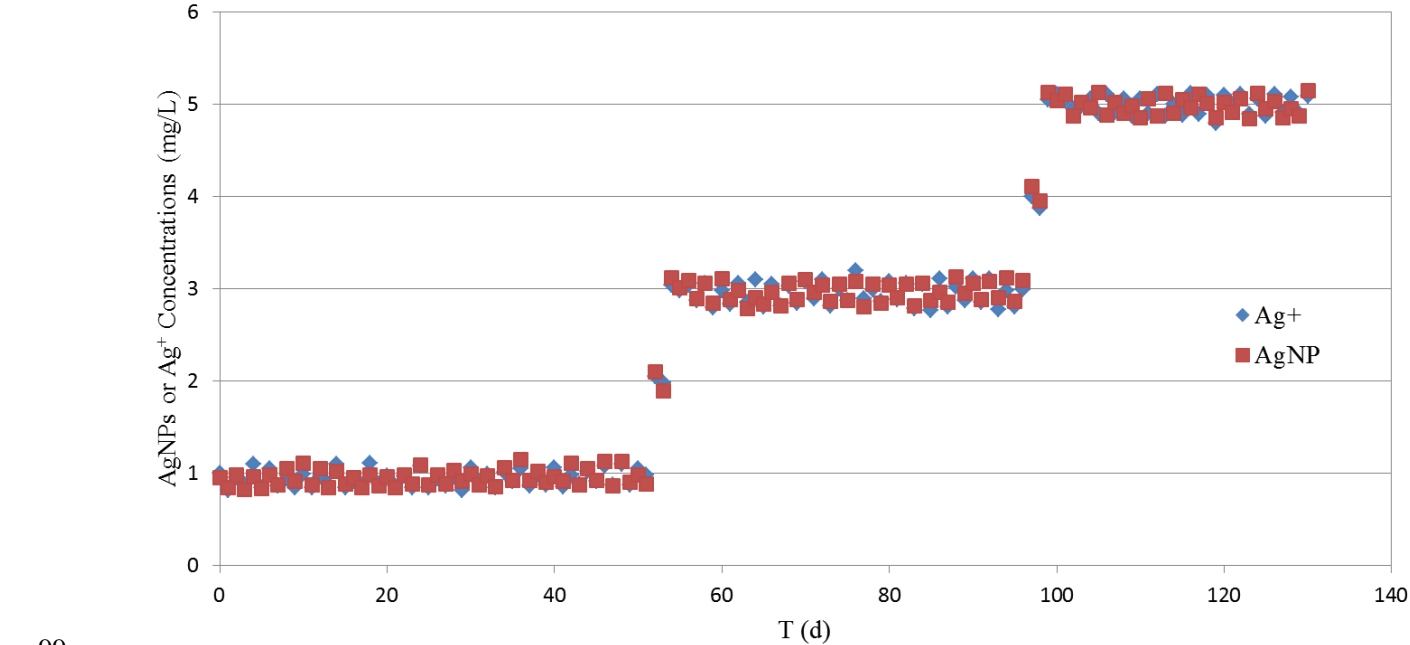

99

100 Fig. S3 The AgNPs or Ag<sup>+</sup> concentration variation in the period of long-term exposure.

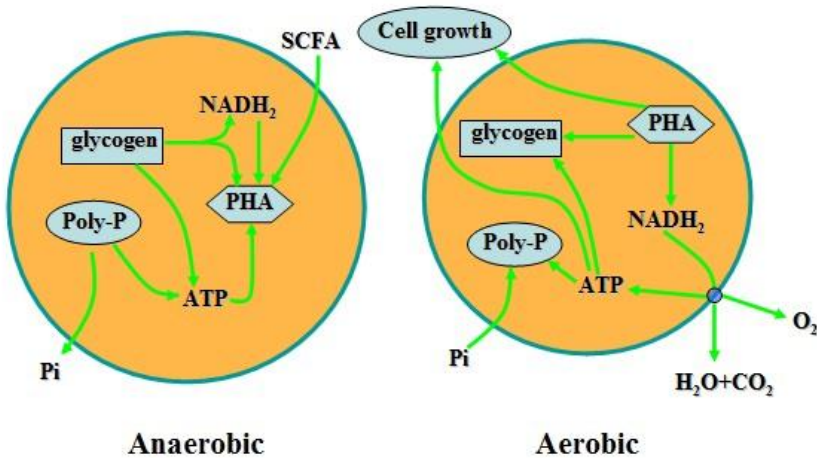

101

102 **Fig. S4** The schematic diagram of main substrates metabolism involved in the anaerobic and aerobic stages of  
103 enhanced biological phosphorus removal.

104

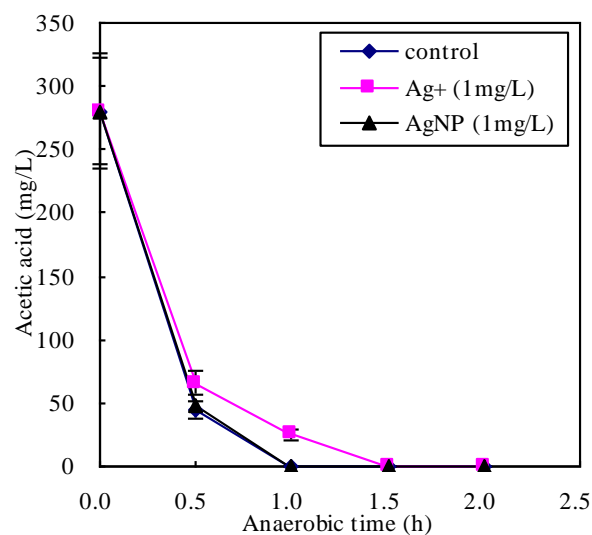

105  
106 **Fig. S5 The changes of acetic acid concentrations. Effects of 1 mg/L of Ag<sup>+</sup> and AgNPs on the variations of**  
107 **acetic acid during the anaerobic time. Error bars represent standard deviations of triplicate measurements**  
108 **between day 1 - day 3.**

**Table S1. Oligonucleotide Probes Used in This Study**

| Probe       | Specificity                                                         | Sequence (5'-3')         | FA (%) |
|-------------|---------------------------------------------------------------------|--------------------------|--------|
| PAO462      | <i>Rhodocyclus</i> -related PAO in <i>Betaproteobacteria</i>        | CCGTCATCTACWCAGGGTATTAAC | 20-35  |
| PAO651      | <i>Rhodocyclus</i> -related PAO in <i>Betaproteobacteria</i>        | CCCTCTGCCAAACTCCAG       | 35     |
| PAO846      | <i>Rhodocyclus</i> -related PAO in <i>Betaproteobacteria</i>        | GTTAGCTACGGCACTAAAAGG    | 35     |
| GAO Q431    | <i>Gammaproteobacteria</i> <i>Competibacter</i> spp.                | TCCCCGCCTAAAGGGCTT       | 35     |
| GAO Q989    | <i>Gammaproteobacteria</i> <i>Competibacter</i> spp.                | TTCCCCGGATGTCAAGGC       | 35     |
| GB_G2       | <i>Gammaproteobacteria</i> <i>Competibacter</i> spp.                | TTCCCCAGATGTCAAGGC       | 35     |
| TFO_DF218   | <i>Defluvicoccus</i> -related TFO in <i>Alphaproteobacteria</i>     | GAAGCCTTTGCCCCCTCAG      | 20-35  |
| TFO_DF618   | <i>Defluvicoccus</i> -related TFO in <i>Alphaproteobacteria</i>     | GCCTCACTTGTCTAACCG       | 20-35  |
| DF988       | <i>Defluvicoccus</i> -related DF in <i>Alphaproteobacteria</i>      | GATACGACGCCCATGTCAAGGG   | 35     |
| DF1020      | <i>Defluvicoccus</i> -related DF in <i>Alphaproteobacteria</i>      | CCGGCCGAACCGACTCCC       | 35     |
| EUB338      | Most Bacteria                                                       | GCTGCCTCCCGTAGGAGT       | 35     |
| EUB338- II  | <i>Planctomycetales</i> and other Bacteria not detected by EUB338   | GCAGCCACCCGTAGGTGT       | 35     |
|             |                                                                     |                          |        |
| EUB338- III | <i>Verrucomicrobiales</i> and other Bacteria not detected by EUB338 | GCTGCCACCCGTAGGTGT       | 35     |

110

| Table S2. The Statistical Analysis Results of the Effect of AgNPs and Ag <sup>+</sup> on Phosphorus Removal |                      |                  |                       |                           |                     |
|-------------------------------------------------------------------------------------------------------------|----------------------|------------------|-----------------------|---------------------------|---------------------|
| Reactor                                                                                                     | Concentration (mg/L) | Operational time | F <sub>observed</sub> | F <sub>significance</sub> | P <sub>(0.05)</sub> |
| AgNPs                                                                                                       | 1                    | Day 1-3          | 0.27                  | 7.71                      | 0.63                |
| Ag <sup>+</sup>                                                                                             | 1                    | Day 1-3          | 17.84                 | 7.71                      | 0.01                |
| AgNPs                                                                                                       | 1                    | Day 4-50         | 1.51                  | 4.41                      | 0.24                |
| Ag <sup>+</sup>                                                                                             | 1                    | Day 40-50        | 0.14                  | 7.71                      | 0.73                |
| AgNPs                                                                                                       | 3                    | Day 51-95        | 0.92                  | 4.41                      | 0.35                |
| Ag <sup>+</sup>                                                                                             | 3                    | Day 85-95        | 1.97                  | 7.71                      | 0.23                |
| AgNPs                                                                                                       | 5                    | Day 96-130       | 2.34                  | 4.60                      | 0.15                |
| Ag <sup>+</sup>                                                                                             | 5                    | Day 120-130      | 0.43                  | 7.71                      | 0.55                |

111

| Table S3. The Statistical Analysis Results of the Short-term (day 1-3) Effect of 1 mg/L AgNPs and Ag <sup>+</sup> on the Anaerobic and Aerobic Transformations of PHA between day 1 and day 3 (Compared with the Control) |                       |                           |                     |                       |                           |                     |
|---------------------------------------------------------------------------------------------------------------------------------------------------------------------------------------------------------------------------|-----------------------|---------------------------|---------------------|-----------------------|---------------------------|---------------------|
|                                                                                                                                                                                                                           | AgNPs                 |                           |                     | Ag <sup>+</sup>       |                           |                     |
|                                                                                                                                                                                                                           | F <sub>observed</sub> | F <sub>significance</sub> | P <sub>(0.05)</sub> | F <sub>observed</sub> | F <sub>significance</sub> | P <sub>(0.05)</sub> |
| PHA anaerobic synthesis                                                                                                                                                                                                   | 3.32                  | 7.71                      | 0.14                | 6.90                  | 7.71                      | 0.06                |
| PHA aerobic degradation                                                                                                                                                                                                   | 0.34                  | 7.71                      | 0.59                | 10.35                 | 7.71                      | 0.03                |

112

**Table S4. Effects of Ag<sup>+</sup> and AgNPs on the Activities of PPX and PPK<sup>a</sup>**

| Reactor         | Concentration (mg/L) | Operational time | PPX <sup>b</sup> | PPK <sup>c</sup> |
|-----------------|----------------------|------------------|------------------|------------------|
| AgNPs           | 1                    | Day 1-3          | 0.08±0.02        | 0.31±0.03        |
| Ag <sup>+</sup> | 1                    | Day 1-3          | 0.05±0.01        | 0.29±0.01        |
| Control         | 0                    | Day 1-3          | 0.09±0.02        | 0.29±0.02        |
| AgNPs           | 1                    | Day 40-50        | 0.09±0.01        | 0.31±0.04        |
| Ag <sup>+</sup> | 1                    | Day 40-50        | 0.08±0.01        | 0.32±0.02        |
| Control         | 0                    | Day 40-50        | 0.10±0.02        | 0.29±0.03        |
| AgNPs           | 5                    | Day 120-130      | 0.08±0.01        | 0.30±0.03        |
| Ag <sup>+</sup> | 5                    | Day 120-130      | 0.09±0.03        | 0.31±0.02        |
| Control         | 0                    | Day 120-130      | 0.09±0.02        | 0.32±0.04        |

<sup>a</sup> The data reported are the averages and their standard deviations of triplicate tests.

<sup>b</sup> The unit is umol *p*-nitrophenol/(min·mg protein).

<sup>c</sup> The unit is umol NADPH/(min·mg protein).

113

**Table S5. DGGE Bands Based on the V3 Region of 16S rRNA Gene and their Closely Related Sequences**

| Band ID | Accession no. | Most closely related bacterial sequence                           |               | Identity (%) |
|---------|---------------|-------------------------------------------------------------------|---------------|--------------|
|         |               | Species and strain                                                | Accession no. |              |
| 1       | JQ954834      | Uncultured <i>Aeromonadaceae</i> bacterium clone 4.13h2           | JN695859.1    | 99           |
| 2       | JQ954835      | Uncultured <i>Arcobacter</i> sp. clone OO.P2.OT.73.ab1            | HQ821665.1    | 99           |
| 3       | JQ954836      | Uncultured <i>Candidatus Accumulibacter</i> sp. clone EMB clone_7 | HM046420.1    | 98           |
| 4       | JQ954837      | Uncultured <i>beta proteobacterium</i> clone P-R68                | JN038855.1    | 99           |
| 5       | JQ954838      | <i>Moraxella</i> sp. B62                                          | JQ390117.1    | 100          |
| 6       | JQ954839      | <i>Pseudomonas</i> sp. qdcs28                                     | JQ319068.1    | 100          |

114

**Table S6. The Statistical Analysis Results of the Effect of Ag<sup>+</sup> and AgNPs on EPS of Activated Sludge (Compared with the Control)**

|                                           |               | AgNPs                 |                           |                     | Ag <sup>+</sup>       |                           |                       |
|-------------------------------------------|---------------|-----------------------|---------------------------|---------------------|-----------------------|---------------------------|-----------------------|
|                                           |               | F <sub>observed</sub> | F <sub>significance</sub> | P <sub>(0.05)</sub> | F <sub>observed</sub> | F <sub>significance</sub> | P <sub>(0.05)</sub>   |
| Sudden addition<br>(1 mg/L, 1-3 d)        | Protein       | 0.29                  | 7.71                      | 0.62                | 0.08                  | 7.71                      | 0.79                  |
|                                           | Carbonhydrate | 4.03                  | 7.71                      | 0.12                | 0.82                  | 7.71                      | 0.42                  |
|                                           | Total EPS     | 0.03                  | 7.71                      | 0.87                | 0.01                  | 7.71                      | 0.91                  |
| Long-term exposure<br>(1 mg/L, 40-50 d)   | Protein       | 0.08                  | 7.71                      | 0.80                | 61.33                 | 7.71                      | 1.40×10 <sup>-3</sup> |
|                                           | Carbonhydrate | 5.59                  | 7.71                      | 0.08                | 40.08                 | 7.71                      | 3.19×10 <sup>-3</sup> |
|                                           | Total EPS     | 0.03                  | 7.71                      | 0.87                | 57.65                 | 7.71                      | 1.61×10 <sup>-3</sup> |
| Long-term exposure<br>(5 mg/L, 120-130 d) | Protein       | 1.13                  | 7.71                      | 0.35                | 49.50                 | 7.71                      | 2.15×10 <sup>-3</sup> |
|                                           | Carbonhydrate | 5.15                  | 7.71                      | 0.09                | 48.52                 | 7.71                      | 2.23×10 <sup>-3</sup> |
|                                           | Total EPS     | 0.32                  | 7.71                      | 0.60                | 48.75                 | 7.71                      | 2.21×10 <sup>-3</sup> |

**References**

1. G. J. F. Smolders, J. Vandermeij, M. C. M. Vanloosdrecht and J. J. Heijnen, *Biotechnol. Bioeng.*, 1994, **43**, 461-470.

2. G.B. Cox , H. Rosenberg, J.A. Downie and S. Silver, *J Bacteriol*, 1981, **148**.

3. S. J. Lee, Y. S. Lee, Y. C. Lee and Y. L. Choi, *J. Basic Microb.*, 2006, **46**, 108-115.

4. N. A. Robinson and H. G. Wood, *J. Biol. Chem.*, 1986, **261**, 4481-4485.

5. Z. Q. Zhang, J. Yu and R. C. Stanton, *Anal. Biochem.*, 2000, **285**, 163-167.

6. C. H. Yang, D. E. Crowley and J. A. Menge, *Fems Microbiology Ecology*, 2001, **35**, 129-136.

7. G. Muyzer, E. C. de Waal and A. G. Uitterlinden, *Appl. Environ. Microbiol.*, 1993, **59**, 695-700.

8. R. I. Amann, W. Ludwig and K. H. Schleifer, *Microbiol Rev*, 1995, **59**, 143-169.

9. A. J. Kennedy, M. S. Hull, A. J. Bednar, J. D. Goss, J. C. Gunter, J. L. Bouldin, P. J. Vikesland and J. A. Steevens, *Environ. Sci. Technol.*, 2010, **44**, 9571-9577.
